# Supplementary material for: A viral fusogen hijacks the actin cytoskeleton to drive cell-cell fusion
Source: eLife. 2020 May 22;9:e51358. doi: 10.7554/eLife.51358 (PMC7244324; doi:10.7554/eLife.51358)
Supplement: Figure 1—figure supplement 1—source data 1. [file elife-51358-fig1-figsupp1-data1.xlsx]

## Sheet: Sheet1
	p14 WT GFP				p14 del ecto GFP					p14 del cyto GFP
replicate	lysate	eluate	eluate:lysate ratio		lysate	eluate	eluate:lysate ratio	normalized to WT		lysate	eluate	eluate:lysate ratio	normalized to WT
1	20630.6	6691.53	0.324349		15790.9	3232.98	0.204737	0.631225		13684.6	2031.33	0.148438	0.45765
2	40344.4	40147.1	0.99511		22076.9	15773.8	0.714493	0.718004		36251.5	13173.9	0.363404	0.36519
3	26366	7967.68	0.302195		15186.3	5119.95	0.337143	1.11565		6516.81	991.355	0.152123	0.503393
