# Supplementary material for: A viral fusogen hijacks the actin cytoskeleton to drive cell-cell fusion
Source: eLife. 2020 May 22;9:e51358. doi: 10.7554/eLife.51358 (PMC7244324; doi:10.7554/eLife.51358)
Supplement: Figure 1—source data 1. [file elife-51358-fig1-data1.xlsx]

## Sheet: Sheet1
# of nuclei per cell	1	2	3	4	5	6	7	8	9	10	11	12	13	14	15	16	17	18	19	20	21	22	23	24	25	26	27	28	29	30	31	32	33	34	35	36	37	38	39	40	41	42	43	44	45	46	47	48	49
12hr -1
# of p14-expressing cells	487	65	23	14	4	2	1
total number of cells counted	596
percent of p14-expressing cell	81.7114	10.906	3.85906	2.34899	0.671141	0.33557	0.167785	0	0	0	0	0	0	0	0	0	0	0	0	0	0	0	0	0	0	0	0	0	0	0	0	0	0	0	0	0	0	0	0	0	0	0	0	0	0	0	0	0	0
12hr -2
# of p14-expressing cells	422	44	17	9	1	0	2	0	1	0	0
total number of cells counted	496
percent of p14-expressing cell	85.0806	8.87097	3.42742	1.81452	0.201613	0	0.403226	0	0.201613	0	0	0	0	0	0	0	0	0	0	0	0	0	0	0	0	0	0	0	0	0	0	0	0	0	0	0	0	0	0	0	0	0	0	0	0	0	0	0	0
12hr -3
# of p14-expressing cells	276	33	1	6	2	2	0	0	0	0	0
total number of cells counted	320
percent of p14-expressing cell	86.25	10.3125	0.3125	1.875	0.625	0.625	0	0	0	0	0	0	0	0	0	0	0	0	0	0	0	0	0	0	0	0	0	0	0	0	0	0	0	0	0	0	0	0	0	0	0	0	0	0	0	0	0	0	0
24hr - 1
# of p14-expressing cells	416	87	47	28	22	9	13	15	11	10	5	6	8	4	2	3	4	4	4	2	0	2	0	2	1	3	0	3	1	0	1	2	3	0	1	0	0	0	0	0	0	1	1	0	0	1	1	0	0
total number of cells counted	724
percent of p14-expressing cell	57.4586	12.0166	6.49171	3.8674	3.03867	1.24309	1.79558	2.07182	1.51934	1.38122	0.690608	0.828729	1.10497	0.552486	0.276243	0.414365	0.552486	0.552486	0.552486	0.276243	0	0.276243	0	0.276243	0.138122	0.414365	0	0.414365	0.138122	0	0.138122	0.276243	0.414365	0	0.138122	0	0	0	0	0	0	0.138122	0.138122	0	0	0.138122	0.138122	0	0
24hr - 2
# of p14-expressing cells	588	117	84	45	25	30	9	11	14	6	12	10	7	4	4	5	3	3	1	3	1	3	3	0	1	0	0	0	0	3	0	1	0	0	0	0	0	0	0	0	0	0	0	0	0	0	0	0	1
total number of cells counted	994
percent of p14-expressing cell	59.1549	11.7706	8.4507	4.52716	2.51509	3.01811	0.905433	1.10664	1.40845	0.603622	1.20724	1.00604	0.704225	0.402414	0.402414	0.503018	0.301811	0.301811	0.100604	0.301811	0.100604	0.301811	0.301811	0	0.100604	0	0	0	0	0.301811	0	0.100604	0	0	0	0	0	0	0	0	0	0	0	0	0	0	0	0	0.100604
24hr - 3
# of p14-expressing cells	439	128	56	42	31	19	15	13	9	4	8	7	7	1	3	1	4	5	1	2	3	3	3	3	2	1	2	0	2	1	0	0	2	0	1	0	1	0	0	0	0	0	0	0	0	0	0	2	0
total number of cells counted	822
percent of p14-expressing cell	53.4063	15.5718	6.81265	5.10949	3.77129	2.31144	1.82482	1.58151	1.09489	0.486618	0.973236	0.851582	0.851582	0.121655	0.364964	0.121655	0.486618	0.608273	0.121655	0.243309	0.364964	0.364964	0.364964	0.364964	0.243309	0.121655	0.243309	0	0.243309	0.121655	0	0	0.243309	0	0.121655	0	0.121655	0	0	0	0	0	0	0	0	0	0	0.243309	0
[truncated: 210 more columns]
