# Supplementary material for: A viral fusogen hijacks the actin cytoskeleton to drive cell-cell fusion
Source: eLife. 2020 May 22;9:e51358. doi: 10.7554/eLife.51358 (PMC7244324; doi:10.7554/eLife.51358)
Supplement: Figure 2—source data 1. [file elife-51358-fig2-data1.xlsx]

## Sheet: Sheet1
Cell line	SYF	SYF	SYF	SYF + c-src	SYF + c-src	SYF + c-src
Replicate	1	2	3	1	2	3
Total number of p14-expressing cells	104	90	73	61	64	68
# of p14-expressing cell with 2 or more nuclei	8	1	2	12	7	11
Percent of p14-expressing cell	7.69231	1.11111	2.73973	19.6721	10.9375	16.1765
Number in each cell below represents number of nuclei in each p14-expressing cell
	2	1	1	2	1	1
	1	1	1	1	1	1
	1	2	1	1	2	1
	1	1	1	1	2	1
	1	1	1	1	1	1
	1	1	1	1	1	1
	1	1	1	2	1	2
	1	1	1	1	1	1
	1	1	1	1	2	1
	2	1	1	3	1	1
	1	1	1	2	1	3
	2	1	1	1	1	1
	1	1	1	1	1	1
	1	1	1	1	1	1
	1	1	1	1	1	1
	1	1	1	1	1	1
	1	1	1	1	1	1
	1	1	1	1	1	1
	1	1	1	1	1	1
	1	1	1	1	2	1
	1	1	1	1	1	4
	1	1	1	1	1	1
	1	1	1	1	1	1
	1	1	1	1	1	1
	1	1	1	4	1	1
	1	1	1	1	1	1
	1	1	1	1	1	3
	1	1	1	1	1	1
	2	1	1	2	1	3
	1	1	1	2	1	1
	1	1	1	1	1	1
	1	1	1	1	1	1
	1	1	2	1	1	1
	1	1	1	1	1	1
	1	1	1	1	2	2
	1	1	1	1	1	1
	1	1	1	4	1	1
	1	1	1	1	1	1
	1	1	1	1	1	1
	1	1	1	1	1	1
	1	1	1	1	1	1
	2	1	1	1	1	1
	1	1	1	1	1	1
	1	1	1	1	1	3
	1	1	1	1	1	1
	1	1	1	2	1	1
	1	1	1	1	1	1
	1	1	1	1	1	1
	1	1	1	1	1	1
	1	1	1	1	1	3
	1	1	1	1	1	1
	1	1	1	1	1	1
	1	1	1	2	1	1
	1	1	1	2	1	1
	1	1	1	1	1	2
	1	1	1	6	2	1
	1	1	1	1	2	1
	1	1	1	1	1	1
	2	1	1	1	1	4
	1	1	1	1	1	1
	1	1	1	1	1	1
	1	1	1		1	1
	1	1	1		1	1
	1	1	1		1	1
	1	1	1			2
	1	1	1			1
	1	1	1			1
	1	1	1			1
	1	1	1
	2	1	3
	1	1	1
	1	1	1
	1	1	1
	1	1
	1	1
	1	1
	1	1
	1	1
	1	1
	1	1
	1	1
	1	1
	1	1
	1	1
	1	1
	2	1
	1	1
	1	1
	1	1
	1	1
	1
	1
	1
	1
	1
	1
	1
	1
	1
	1
	1
	1
	1
	1
