# Supplementary material for: A viral fusogen hijacks the actin cytoskeleton to drive cell-cell fusion
Source: eLife. 2020 May 22;9:e51358. doi: 10.7554/eLife.51358 (PMC7244324; doi:10.7554/eLife.51358)
Supplement: Figure 3—figure supplement 1—source data 1. [file elife-51358-fig3-figsupp1-data1.xlsx]

## Sheet: Sheet1
	p14 WT GFP				p14 FVAI GFP
replicate	lysate	eluate	eluate:lysate ratio		lysate	eluate	eluate:lysate ratio	normalized to WT
1	20714.1	15280.8	0.737701		16184.5	12025.9	0.743054	1.00726
2	17873.5	15016	0.840131		13255.4	7703.15	0.581133	0.691717
3	13330.5	6263.98	0.469899		5961.72	3390.43	0.568699	1.21026
