# Supplementary material for: A viral fusogen hijacks the actin cytoskeleton to drive cell-cell fusion
Source: eLife. 2020 May 22;9:e51358. doi: 10.7554/eLife.51358 (PMC7244324; doi:10.7554/eLife.51358)
Supplement: Figure 3—source data 1. [file elife-51358-fig3-data1.xlsx]

## Sheet: master
	Grb2GFP at PM : median Grb2GFP in cytosol Ratio
WT -1	1.7933	1.47514	0.719689	0.927716	1.97245	1.33438	1.63917	1.53346	1.62231	2.0942	2.36706	1.21569	1.5767	1.37784	1.26452
WT -2	2.02232	2.65796	1.85977	3.89237	1.68713	1.95628	3.16341	1.4394
WT -3	1.8777	1.53868	1.63172	1.54345	1.02912	1.539	2.1419	2.87141	1.57408	1.54228
FVAI -1	0.767682	1.01588	0.788259	0.818051	0.949418	1.02125	0.907714	0.872538	0.74294
FVAI -2	1.08966	1.05819	0.663474	1.06484	1.35913	1.04993	0.815653	1.0719
FVAI -3	0.997765	1.0404	0.90407	0.944838	0.826289	1.11354	0.917418	1.05716	0.831543
cell -1	0.85386	0.901381	0.853823	0.997354	1.07153	0.838448	0.964996	0.715757
cell -2	0.93725	1.12007	0.976533	0.984801	0.997434	1.00459	0.833928	1.08158
cell -3	1.11936	1.02566	0.969974	0.915752	0.897852	0.869081	0.850313	1.02922
