# Supplementary material for: A viral fusogen hijacks the actin cytoskeleton to drive cell-cell fusion
Source: eLife. 2020 May 22;9:e51358. doi: 10.7554/eLife.51358 (PMC7244324; doi:10.7554/eLife.51358)
Supplement: Figure 4—figure supplement 1—source data 1. [file elife-51358-fig4-figsupp1-data1.xlsx]

## Sheet: Sheet1
	p14 WT GFP +DMSO				p14 WT GFP +Wiskostatin					p14 WT GFP +CK666
replicate	lysate	eluate	eluate:lysate ratio		lysate	eluate	eluate:lysate ratio	normalized to WT		lysate	eluate	eluate:lysate ratio	normalized to WT
1	14041.7	14389.5	1.02477		15862.3	17967.9	1.13274	1.10537		10208.3	13062.7	1.27962	1.24869
2	13544.1	13651.4	1.00792		8459.24	12145.7	1.43579	1.42451		6186.8	6080.65	0.982842	0.975121
3	13330.5	6263.98	0.469899		16779.9	16794.7	1.00088	2.12999		8686.51	6667.56	0.767576	1.63349
