# Supplementary material for: A viral fusogen hijacks the actin cytoskeleton to drive cell-cell fusion
Source: eLife. 2020 May 22;9:e51358. doi: 10.7554/eLife.51358 (PMC7244324; doi:10.7554/eLife.51358)
Supplement: Figure 4—source data 1. [file elife-51358-fig4-data1.xlsx]

## Sheet: Sheet1
# of nuclei per cell	1	2	3	4	5	6	7	8	9	10	11	12	13	14	15	16	17	18	19	20	21	22	23	24	25	26	27	28	29	30	31	32	33	34	35	36	37	38	39	40	41	42	43	44	45	46	47	48	49
WT-1
# of p14-expressing cells	324	89	55	38	34	19	8	14	16	7	7	6	5	1	3	2	3	3	4	1	0	2	3	0	1	2	1	1	2	1	0	2	2	0	0	2	0	0	0	1	1	2	1	0	0	0	0	0	1
total number of cells counted	667
percent of p14-expressing cell	48.5757	13.3433	8.24588	5.69715	5.09745	2.84858	1.1994	2.09895	2.3988	1.04948	1.04948	0.89955	0.749625	0.149925	0.449775	0.29985	0.449775	0.449775	0.5997	0.149925	0	0.29985	0.449775	0	0.149925	0.29985	0.149925	0.149925	0.29985	0.149925	0	0.29985	0.29985	0	0	0.29985	0	0	0	0.149925	0.149925	0.29985	0.149925	0	0	0	0	0	0.149925
WT-2
# of p14-expressing cells	244	99	49	25	34	15	13	8	6	9	9	3	5	6	3	2	3	3	2	0	1	0	1	0	0	0	2	3	2	1	1	1	0	0	0	0	0	0	1	0	1	0	0	1	0	0	0	1	0
total number of cells counted	557
percent of p14-expressing cell	43.8061	17.7738	8.79713	4.48833	6.10413	2.693	2.33393	1.43627	1.0772	1.6158	1.6158	0.5386	0.897666	1.0772	0.5386	0.359066	0.5386	0.5386	0.359066	0	0.179533	0	0.179533	0	0	0	0.359066	0.5386	0.359066	0.179533	0.179533	0.179533	0	0	0	0	0	0	0.179533	0	0.179533	0	0	0.179533	0	0	0	0.179533	0
WT-3
# of p14-expressing cells	258	104	70	36	28	20	15	11	5	5	11	5	3	4	7	1	2	2	2	0	2	2	0	1	1	1	0	1	0	2	2	1	2	0	2	1	0	1	1	1	0	0	0	0	0	0	0	0	0
total number of cells counted	612
percent of p14-expressing cell	42.1569	16.9935	11.4379	5.88235	4.57516	3.26797	2.45098	1.79739	0.816993	0.816993	1.79739	0.816993	0.490196	0.653595	1.14379	0.163399	0.326797	0.326797	0.326797	0	0.326797	0.326797	0	0.163399	0.163399	0.163399	0	0.163399	0	0.326797	0.326797	0.163399	0.326797	0	0.326797	0.163399	0	0.163399	0.163399	0.163399	0	0	0	0	0	0	0	0	0
Nterm -1
# of p14-expressing cells	645	133	71	43	31	22	11	6	7	4	3	1	1	1	1	1	1	0	0	0	0	1	0	0	0	0	0	0	0	0	0	0	1	0	0	0	0	0	0	0	0	0	0	0	0	0	0	0	0
total number of cells counted	984
percent of p14-expressing cell	65.5488	13.5163	7.21545	4.36992	3.15041	2.23577	1.11789	0.609756	0.711382	0.406504	0.304878	0.101626	0.101626	0.101626	0.101626	0.101626	0.101626	0	0	0	0	0.101626	0	0	0	0	0	0	0	0	0	0	0.101626	0	0	0	0	0	0	0	0	0	0	0	0	0	0	0	0
Nterm -2
# of p14-expressing cells	720	144	56	38	24	25	11	6	4	2	3	6	5	0	2	1	1	0	0	0	0	1	0	0	1	0	0	0	1	0	0	0	0	0	0	0	0	0	0	0	0	0	0	0	0	0	0	0	0
total number of cells counted	1051
percent of p14-expressing cell	68.5062	13.7012	5.32826	3.6156	2.28354	2.37869	1.04662	0.570885	0.38059	0.190295	0.285442	0.570885	0.475737	0	0.190295	0.0951475	0.0951475	0	0	0	0	0.0951475	0	0	0.0951475	0	0	0	0.0951475	0	0	0	0	0	0	0	0	0	0	0	0	0	0	0	0	0	0	0	0
Nterm -3
# of p14-expressing cells	688	108	93	48	43	21	15	7	5	6	4	1	3	2	1	1	3	2	1	1	0	1	0	2	0	0	0	0	0	0	0	0	0	0	2	0	1	0	0	0	0	0	1	0	0	0	0	0	0
total number of cells counted	1060
percent of p14-expressing cell	64.9057	10.1887	8.77358	4.5283	4.0566	1.98113	1.41509	0.660377	0.471698	0.566038	0.377358	0.0943396	0.283019	0.188679	0.0943396	0.0943396	0.283019	0.188679	0.0943396	0.0943396	0	0.0943396	0	0.188679	0	0	0	0	0	0	0	0	0	0	0.188679	0	0.0943396	0	0	0	0	0	0.0943396	0	0	0	0	0	0
Cterm - 1
# of p14-expressing cells	443	118	70	48	34	39	23	20	17	19	3	5	7	7	4	4	7	3	4	2	3	2	1	2	4	2	1	1	2	2	0	1	1	0	2	0	2	2	0	1	0	1	0	1	0	1	0	2	1
total number of cells counted	916
percent of p14-expressing cell	48.3624	12.8821	7.64192	5.24017	3.71179	4.25764	2.51092	2.18341	1.8559	2.07424	0.327511	0.545852	0.764192	0.764192	0.436681	0.436681	0.764192	0.327511	0.436681	0.218341	0.327511	0.218341	0.10917	0.218341	0.436681	0.218341	0.10917	0.10917	0.218341	0.218341	0	0.10917	0.10917	0	0.218341	0	0.218341	0.218341	0	0.10917	0	0.10917	0	0.10917	0	0.10917	0	0.218341	0.10917
Cterm - 2
# of p14-expressing cells	302	118	66	40	30	19	15	12	16	12	8	5	8	4	1	3	2	1	1	1	0	4	3	1	1	0	1	0	2	2	0	0	0	2	0	1	0	0	1	0	0	1	0	0	0	1	0	0	0
total number of cells counted	688
percent of p14-expressing cell	43.8953	17.1512	9.59302	5.81395	4.36047	2.76163	2.18023	1.74419	2.32558	1.74419	1.16279	0.726744	1.16279	0.581395	0.145349	0.436047	0.290698	0.145349	0.145349	0.145349	0	0.581395	0.436047	0.145349	0.145349	0	0.145349	0	0.290698	0.290698	0	0	0	0.290698	0	0.145349	0	0	0.145349	0	0	0.145349	0	0	0	0.145349	0	0	0
Cterm - 3
# of p14-expressing cells	439	129	61	51	35	22	24	12	12	6	5	13	7	5	7	2	3	3	2	1	4	0	1	3	1	0	2	1	0	0	2	2	5	1	1	2	0	0	0	2	0	0	0	1	1	0	3	1	1
total number of cells counted	880
percent of p14-expressing cell	49.8864	14.6591	6.93182	5.79545	3.97727	2.5	2.72727	1.36364	1.36364	0.681818	0.568182	1.47727	0.795455	0.568182	0.795455	0.227273	0.340909	0.340909	0.227273	0.113636	0.454545	0	0.113636	0.340909	0.113636	0	0.227273	0.113636	0	0	0.227273	0.227273	0.568182	0.113636	0.113636	0.227273	0	0	0	0.227273	0	0	0	0.113636	0.113636	0	0.340909	0.113636	0.113636
SH2 - 1
# of p14-expressing cells	504	90	74	46	39	25	15	6	6	8	9	7	2	3	3	4	2	0	0	0	1	1	0	0	1	0	3	0	1	0	0	0	0	0	0	0	0	0	0	0	0	1	1	0	0	0	0	0	0
total number of cells counted	852
percent of p14-expressing cell	59.1549	10.5634	8.68545	5.39906	4.57746	2.93427	1.76056	0.704225	0.704225	0.938967	1.05634	0.821596	0.234742	0.352113	0.352113	0.469484	0.234742	0	0	0	0.117371	0.117371	0	0	0.117371	0	0.352113	0	0.117371	0	0	0	0	0	0	0	0	0	0	0	0	0.117371	0.117371	0	0	0	0	0	0
SH2 - 2
# of p14-expressing cells	589	128	73	64	36	30	12	14	11	3	6	3	5	9	3	5	2	1	0	1	2	1	1	2	1	1	1	0	0	0	0	0	0	0	0	0	0	0	0	0	0	0	0	0	0	0	0	0	0
total number of cells counted	1005
percent of p14-expressing cell	58.607	12.7363	7.26368	6.36816	3.58209	2.98507	1.19403	1.39303	1.09453	0.298507	0.597015	0.298507	0.497512	0.895522	0.298507	0.497512	0.199005	0.0995025	0	0.0995025	0.199005	0.0995025	0.0995025	0.199005	0.0995025	0.0995025	0.0995025	0	0	0	0	0	0	0	0	0	0	0	0	0	0	0	0	0	0	0	0	0	0
SH2 - 3
# of p14-expressing cells	470	132	93	55	36	23	18	16	9	10	11	7	5	1	1	2	2	1	3	0	2	0	2	2	0	1	0	2	0	0	0	0	1	0	1	0	0	0	0	0	0	0	0	0	0	0	0	1	0
total number of cells counted	908
percent of p14-expressing cell	51.7621	14.5374	10.2423	6.05727	3.96476	2.53304	1.98238	1.76211	0.991189	1.10132	1.21145	0.770925	0.550661	0.110132	0.110132	0.220264	0.220264	0.110132	0.330396	0	0.220264	0	0.220264	0.220264	0	0.110132	0	0.220264	0	0	0	0	0.110132	0	0.110132	0	0	0	0	0	0	0	0	0	0	0	0	0.110132	0
[truncated: 210 more columns]
