# Supplementary material for: A viral fusogen hijacks the actin cytoskeleton to drive cell-cell fusion
Source: eLife. 2020 May 22;9:e51358. doi: 10.7554/eLife.51358 (PMC7244324; doi:10.7554/eLife.51358)
Supplement: Figure 5—figure supplement 1—source data 1. [file elife-51358-fig5-figsupp1-data1.xlsx]

## Sheet: Sheet1
	p14 WT GFP				p14 del ecto GFP
replicate	lysate	eluate	eluate:lysate ratio		lysate	eluate	eluate:lysate ratio	normalized to WT
1	20630.6	6691.53	0.324349		15790.9	3232.98	0.204737	0.631225
2	40344.4	40147.1	0.99511		22076.9	15773.8	0.714493	0.718004
3	26366	7967.68	0.302195		15186.3	5119.95	0.337143	1.11565
