# Supplementary material for: A viral fusogen hijacks the actin cytoskeleton to drive cell-cell fusion
Source: eLife. 2020 May 22;9:e51358. doi: 10.7554/eLife.51358 (PMC7244324; doi:10.7554/eLife.51358)
Supplement: Figure 5—figure supplement 2—source data 1. [file elife-51358-fig5-figsupp2-data1.xlsx]

## Sheet: Sheet1
	p14 mcherry intensity at fusion site normalized to intensity elsewhere on the plasma membrane
time (sec)	1	2	3	4	5	6	average	stdev
-200	1.04097	1.08322	1.13286	1.17228	1.11997	0.978043	1.10986	0.069948
-180	1.00046	0.946629	1.20196	1.20202	1.16921	0.963192	1.10406	0.122866
-160	0.89328	1.05667	0.977523	1.21697	1.0273	0.955962	1.03435	0.11149
-140	0.973417	1.03811	1.11142	0.942073	0.990958	0.94311	1.0112	0.0651884
-120	1.02411	1.06712	1.09062	0.967823	0.988035	0.949678	1.02754	0.0560998
-100	0.998432	1.08361	1.11156	1.00241	1.03864	0.935822	1.04693	0.0635825
-80	0.955116	1.0733	1.09916	1.20194	1.0982	0.936322	1.08555	0.0996114
-60	1.02129	0.992077	1.0813	0.924301	1.07817	1.07839	1.01943	0.0632072
-40	1.04553	1.10321	1.10566	0.864091	1.11318	0.966228	1.04633	0.0997821
-20	0.908285	1.12035	1.04715	1.07008	1.02723	0.973488	1.03462	0.0746897
0	1.04612	1.01046	0.974161	1.03904	1.06529	1.05383	1.02701	0.0335895
	SH2-GFP intensity at fusion site normalized to intensity elsewhere on the plasma membrane
time (sec)	1	2	3	4	5		average	stdev
-210	1.20172	1.10609	0.952894	1.08539	1.02175		1.07357	0.093364
-190	1.10106	1.15145	0.872881	1.08173	0.985861		1.0386	0.110386
-170	1.10239	1.18674	0.983722	1.13667	0.952583		1.07242	0.100404
-150	1.10167	1.0668	0.935839	1.11273	1.04486		1.05238	0.0705668
-130	1.18297	1.08069	0.915999	1.16276	0.989753		1.06643	0.113549
-110	1.16863	1.08772	0.961496	1.13063	0.945505		1.0588	0.100453
-90	1.11132	1.12433	0.94215	1.09328	1.11732		1.07768	0.0766342
-70	1.09955	1.15553	0.960294	1.03887	0.991818		1.04921	0.079284
-50	1.15672	1.10944	1.03181	1.04276	1.00305		1.06876	0.0627511
-30	1.19221	1.07557	1.08331	1.19087	0.927959		1.09399	0.108458
0	1.16488	1.06239	0.916392	1.11911	0.936003		1.03975	0.110055
