# Supplementary material for: A viral fusogen hijacks the actin cytoskeleton to drive cell-cell fusion
Source: eLife. 2020 May 22;9:e51358. doi: 10.7554/eLife.51358 (PMC7244324; doi:10.7554/eLife.51358)
Supplement: Figure 5—source data 1. [file elife-51358-fig5-data1.xlsx]

## Sheet: Sheet1
# of nuclei per cell	1	2	3	4	5	6	7	8	9	10	11	12	13	14	15	16	17	18	19	20	21	22	23	24	25	26	27	28	29	30	31	32	33	34	35	36	37	38	39	40	41	42	43	44	45	46	47	48	49
SH2-1
# of p14-expressing cells	340	102	45	35	19	10	8	5	6	8	5	4	4	1	1	1	0	1	2	0	1	1	0	0	0	0	0	0	0	0	0	0	0	0	0	0
total number of cells counted	599
Percent of p14-expressing cell	56.7613	17.0284	7.51252	5.84307	3.17195	1.66945	1.33556	0.834725	1.00167	1.33556	0.834725	0.66778	0.66778	0.166945	0.166945	0.166945	0	0.166945	0.33389	0	0.166945	0.166945	0	0	0	0	0	0	0	0	0	0	0	0	0	0	0	0	0	0	0	0	0	0	0	0	0	0	0
SH2-2
# of p14-expressing cells	386	93	58	28	18	14	9	9	12	8	3	1	3	3	4	3	1	0	0	3	0	0	0	0	0	0	0	0	1	0	0	0	0	0	0	0
total number of cells counted	657
Percent of p14-expressing cell	58.7519	14.1553	8.82801	4.2618	2.73973	2.1309	1.36986	1.36986	1.82648	1.21766	0.456621	0.152207	0.456621	0.456621	0.608828	0.456621	0.152207	0	0	0.456621	0	0	0	0	0	0	0	0	0.152207	0	0	0	0	0	0	0	0	0	0	0	0	0	0	0	0	0	0	0	0
SH2-3
# of p14-expressing cells	447	127	88	45	27	22	14	14	9	9	6	2	2	2	1	3	3	1	2	2	2	1	0	1	0	0	2	0	0	1	0	1	0	0	0	0
total number of cells counted	834
Percent of p14-expressing cell	53.5971	15.2278	10.5516	5.39568	3.23741	2.63789	1.67866	1.67866	1.07914	1.07914	0.719424	0.239808	0.239808	0.239808	0.119904	0.359712	0.359712	0.119904	0.239808	0.239808	0.239808	0.119904	0	0.119904	0	0	0.239808	0	0	0.119904	0	0.119904	0	0	0	0	0	0	0	0	0	0	0	0	0	0	0	0	0
R47-1
# of p14-expressing cells	210	75	43	39	20	28	15	10	12	16	8	6	3	0	2	3	4	2	1	2	1	2	0	0	0	0	6	1	1	2	0	1	0	0	0	1	0	0	0	0	0	0	0	0	0	0	0	0	0
total number of cells counted	515
Percent of p14-expressing cell	40.7767	14.5631	8.34951	7.57282	3.8835	5.43689	2.91262	1.94175	2.3301	3.1068	1.5534	1.16505	0.582524	0	0.38835	0.582524	0.776699	0.38835	0.194175	0.38835	0.194175	0.38835	0	0	0	0	1.16505	0.194175	0.194175	0.38835	0	0.194175	0	0	0	0.194175	0	0	0	0	0	0	0	0	0	0	0	0	0
R47-2
# of p14-expressing cells	148	47	32	18	25	13	12	12	10	5	6	6	3	5	5	1	3	1	4	4	2	1	0	1	1	1	0	3	0	0	0	0	1	1	0	0	0	0	0	0	0	0	0	0	0	0	0	0	0
total number of cells counted	371
Percent of p14-expressing cell	39.8922	12.6685	8.62534	4.85175	6.73854	3.50404	3.2345	3.2345	2.69542	1.34771	1.61725	1.61725	0.808625	1.34771	1.34771	0.269542	0.808625	0.269542	1.07817	1.07817	0.539084	0.269542	0	0.269542	0.269542	0.269542	0	0.808625	0	0	0	0	0.269542	0.269542	0	0	0	0	0	0	0	0	0	0	0	0	0	0	0
R47-3
# of p14-expressing cells	290	97	53	37	25	14	11	11	10	6	5	6	5	5	0	3	2	0	3	1	2	0	1	2	2	2	0	0	0	1	0	1	0	0	0	0	0	1	0	0	0	0	0	0	0	0	0	0	0
total number of cells counted	596
Percent of p14-expressing cell	48.6577	16.2752	8.89262	6.20805	4.19463	2.34899	1.84564	1.84564	1.67785	1.00671	0.838926	1.00671	0.838926	0.838926	0	0.503356	0.33557	0	0.503356	0.167785	0.33557	0	0.167785	0.33557	0.33557	0.33557	0	0	0	0.167785	0	0.167785	0	0	0	0	0	0.167785	0	0	0	0	0	0	0	0	0	0	0
WT-1
# of p14-expressing cells	303	109	68	56	47	24	22	20	13	15	10	12	3	8	2	3	5	0	4	4	2	3	5	1	3	0	1	1	1	0	0	3	0	0	1	0	1	1	0	0	0	0	0	0	0	0	0	0	0
total number of cells counted	751
Percent of p14-expressing cell	40.3462	14.514	9.05459	7.45672	6.25832	3.19574	2.92943	2.66312	1.73103	1.99734	1.33156	1.59787	0.399467	1.06525	0.266312	0.399467	0.665779	0	0.532623	0.532623	0.266312	0.399467	0.665779	0.133156	0.399467	0	0.133156	0.133156	0.133156	0	0	0.399467	0	0	0.133156	0	0.133156	0.133156	0	0	0	0	0	0	0	0	0	0	0
WT-2
# of p14-expressing cells	300	112	66	44	20	27	17	9	19	10	8	4	13	3	4	3	3	3	1	1	0	2	3	0	0	2	1	2	0	0	1	2	2	1	1	1	0	0	0	0	0	0	0	0	0	1	0	0	0
total number of cells counted	686
Percent of p14-expressing cell	43.7318	16.3265	9.62099	6.41399	2.91545	3.93586	2.47813	1.31195	2.76968	1.45773	1.16618	0.58309	1.89504	0.437318	0.58309	0.437318	0.437318	0.437318	0.145773	0.145773	0	0.291545	0.437318	0	0	0.291545	0.145773	0.291545	0	0	0.145773	0.291545	0.291545	0.145773	0.145773	0.145773	0	0	0	0	0	0	0	0	0	0.145773	0	0	0
WT-3
# of p14-expressing cells	319	113	53	48	26	24	13	11	14	12	9	12	5	5	3	5	2	3	5	1	6	1	2	1	0	0	1	0	1	2	1	0	2	0	0	0	3	0	0	0	0	0	0	0	1	0	0	0	0
total number of cells counted	704
Percent of p14-expressing cell	45.3125	16.0511	7.52841	6.81818	3.69318	3.40909	1.84659	1.5625	1.98864	1.70455	1.27841	1.70455	0.710227	0.710227	0.426136	0.710227	0.284091	0.426136	0.710227	0.142045	0.852273	0.142045	0.284091	0.142045	0	0	0.142045	0	0.142045	0.284091	0.142045	0	0.284091	0	0	0	0.426136	0	0	0	0	0	0	0	0.142045	0	0	0	0
[truncated: 210 more columns]
